# Supplementary material for: Hierarchical porous CNTs@NCS@MnO2composites: rational design and high asymmetric supercapacitor performance
Source: Royal Society of Chemistry journal article supplement (doi:10.1039/c5ta03224e), 2015-01-01
Supplement: c5ta03224e1.pdf [file c5ta03224e1.pdf]

## **Electronic Supplementary Information**

**Hierarchical porous CNTs@NCS@MnO<sub>2</sub> composites:  
rational design and high asymmetric supercapacitor  
performance**

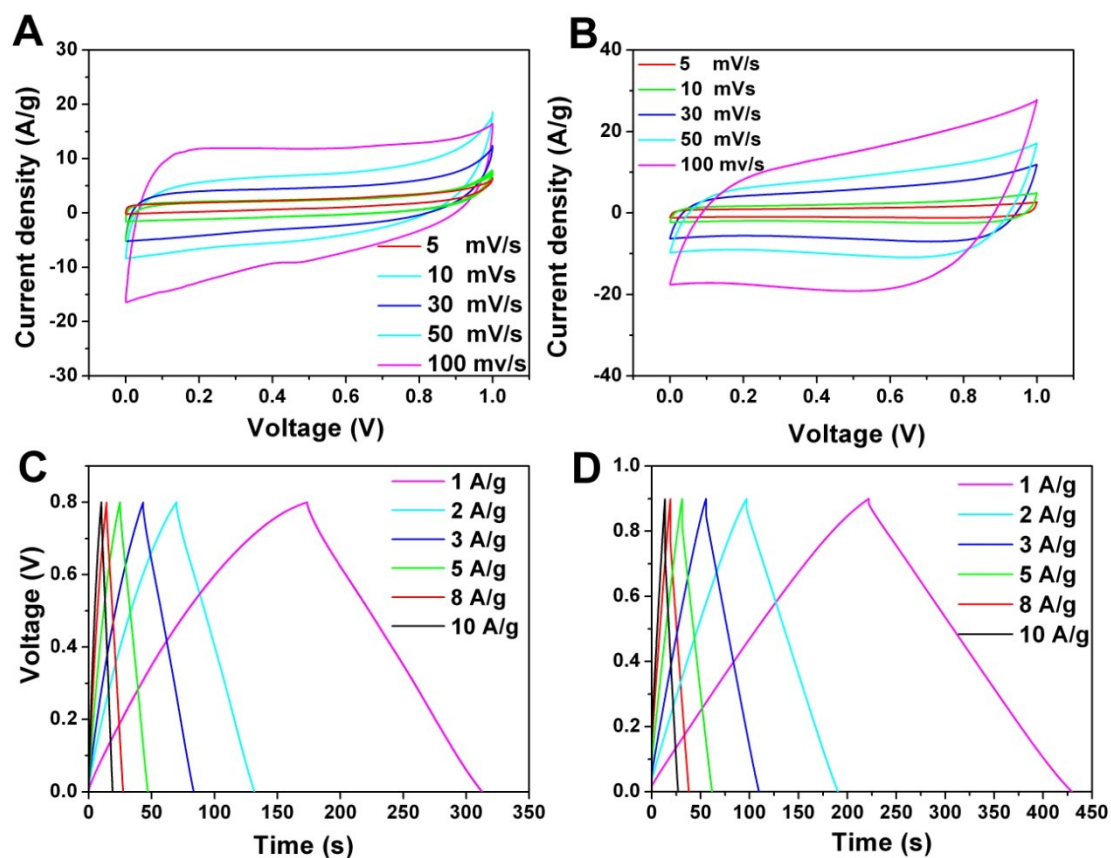

**Fig. S1** Cyclic voltammograms curves at scan rates at various discharge current and Charge-discharge curves of CNTs@NCS (A, C) and CNTs@MnO<sub>2</sub> composites(B, D) measured at various discharge current.

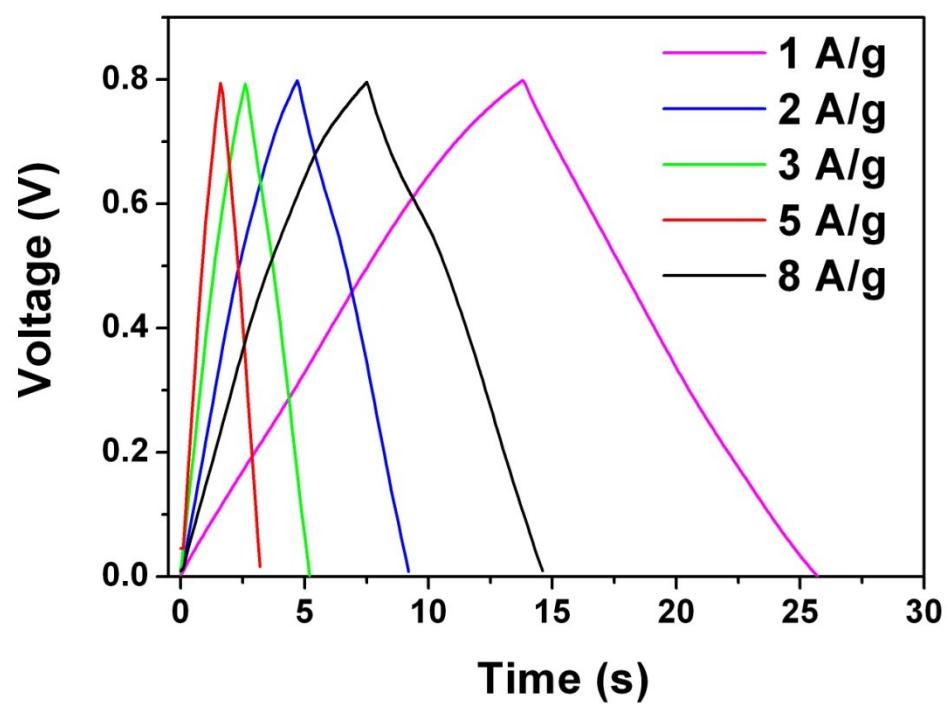

**Fig. S2** Charge-discharge curves of CNTs.

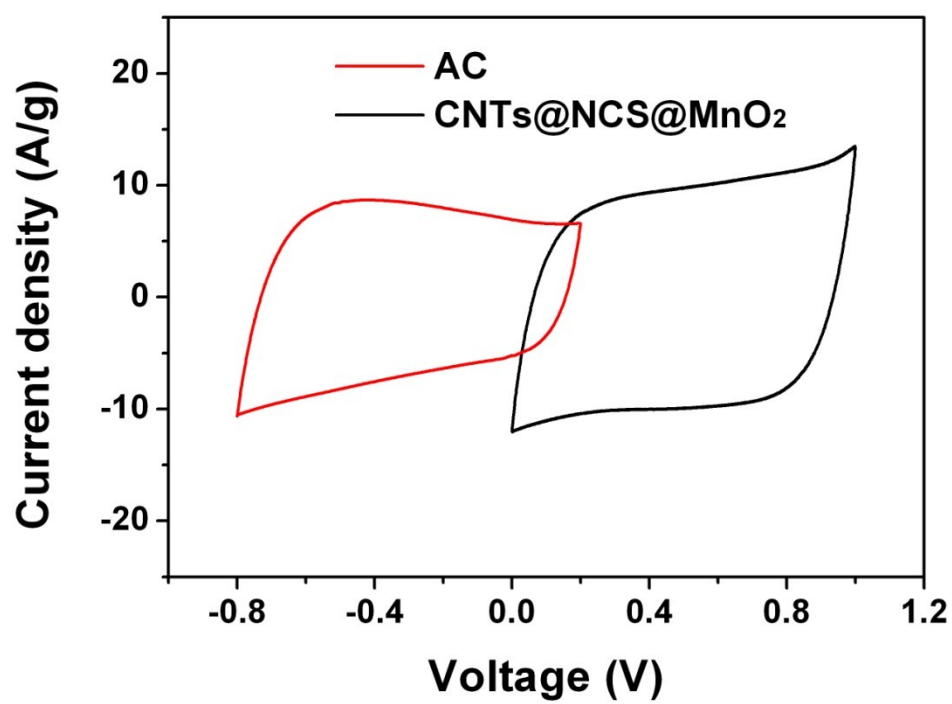

**Fig. S3** CV curves of AC and CNTs@NCS@MnO<sub>2</sub> measured in a three-electrode device in 1 M Na<sub>2</sub>SO<sub>4</sub> aqueous solution at a scan rate of 30 mV/ s
